# Supplementary material
Source: HighWire-hosted journal article supplement (https://svn.bmj.com/content/svn-2020-000352)
Supplement: inline-supplementary-material-4 [file inline-supplementary-material-4.pdf]

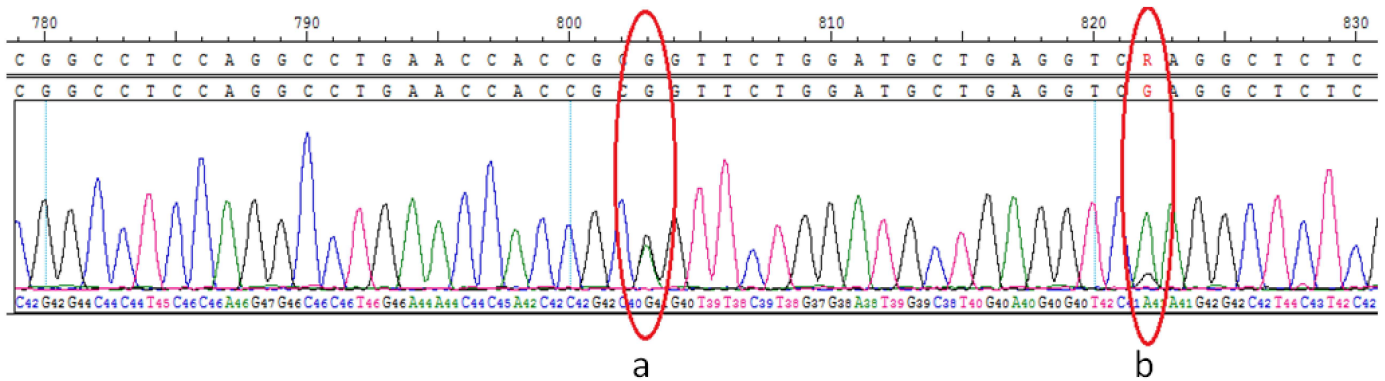

Figure S1 A common SNP (rs199685642) with a homozygous alternative-allele genotype (AA) was found in the panel and Sanger sequencing at one locus (*PKD1* c.1138C>T, p.R380C).

a: chr16-2167855, *PKD1* c.1138C>T, p.R380C

b: SNP (rs199685642) was identified as a homozygous mutation by NGS and Sanger sequencing. The black curve under the green peak was regarded as noise.
